# Supplementary material
Source: PubMed Central journal article supplement (PMC1133925)
Supplement: bj3820145add.pdf [file bj3820145add.pdf]

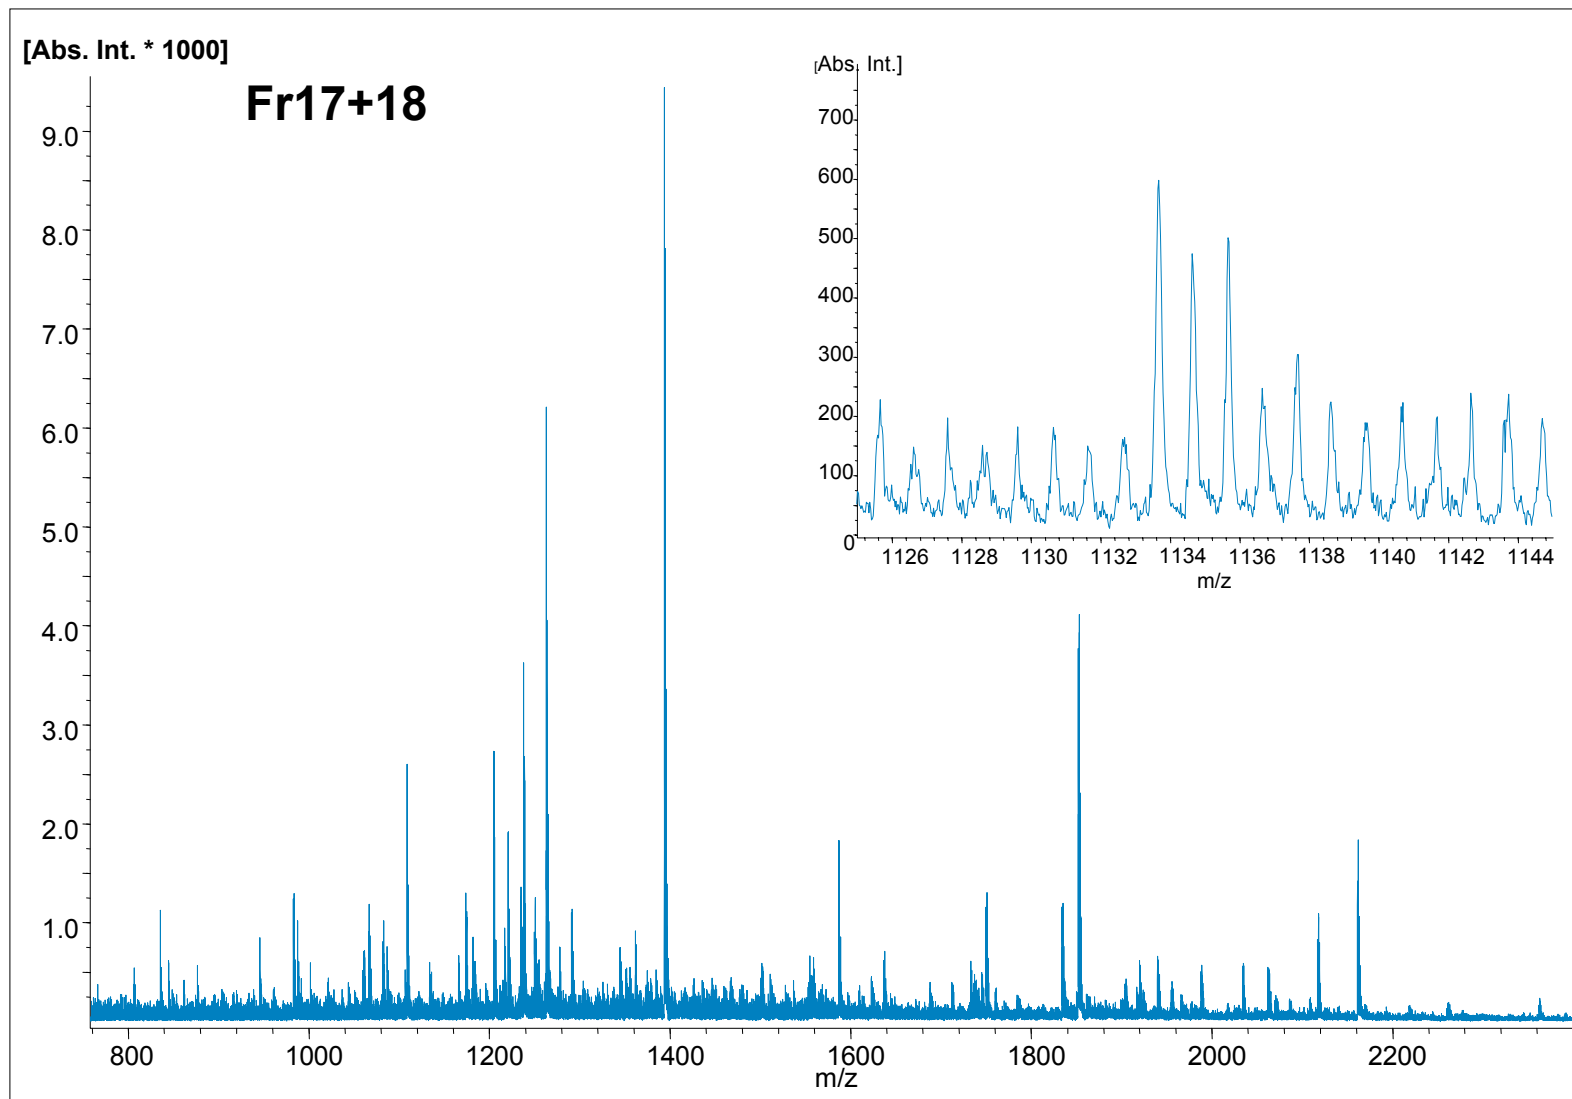

Fig. 1: Mass spectrum of reverse phase-HPLC fractions 17+18. Water-soluble V8 degradation products coming from exposed regions of thylakoid proteins were fractionated by reverse phase-HPLC on a Deltapak C18 column. Thirty four fractions were collected. Each fraction was dried down, resuspended in acetonitrile:water:trifluoroacetic acid and analysed by Matrix-Assisted Laser Desorption/Ionisation Time-Of-Flight (MALDI-TOF) with a mass spectrometer Bruker Reflex IV. The inset shows the magnified 1124-1146 m/z region.

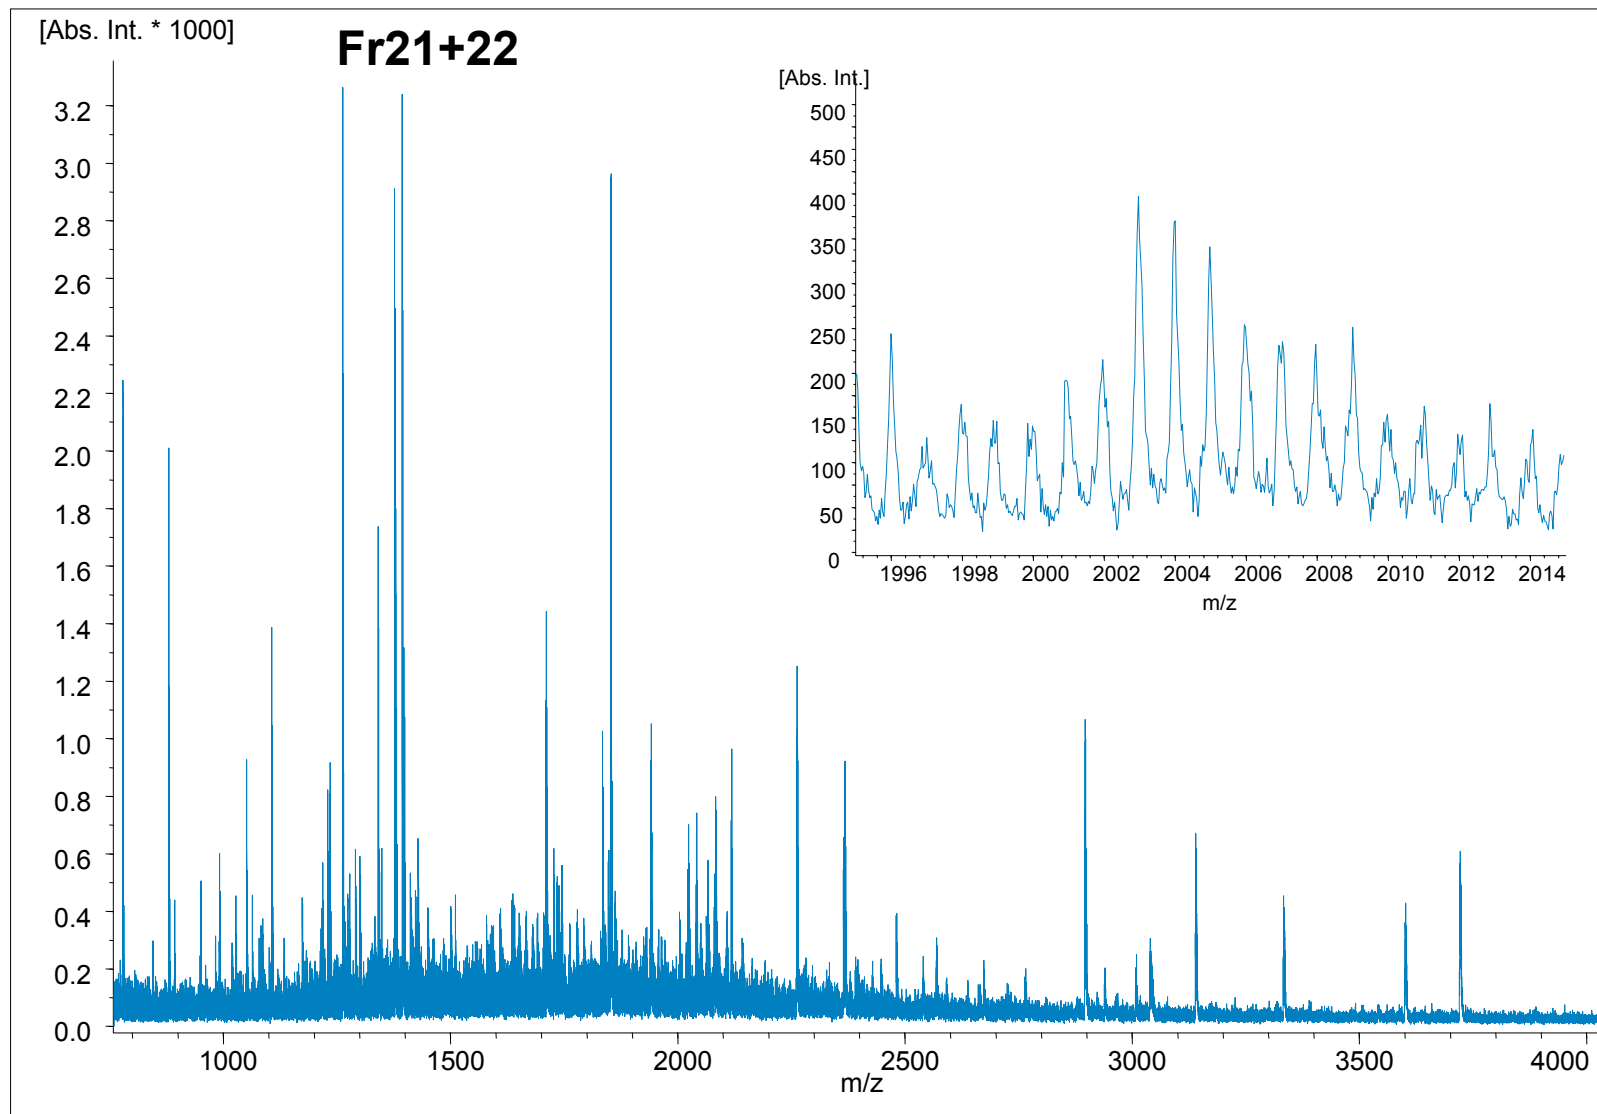

Fig. 2: Mass spectrum of reverse phase-HPLC fractions 21+22. Water-soluble V8 degradation products coming from exposed regions of thylakoid proteins were fractionated by reverse phase-HPLC on a Deltapak C18 column. Thirty four fractions were collected. Each fraction was dried down, resuspended in acetonitrile:water:trifluoroacetic acid and analysed by Matrix-Assisted Laser Desorption/Ionisation Time-Of-Flight (MALDI-TOF) with a mass spectrometer Bruker Reflex IV. The inset shows the magnified 1994-2016 m/z region.
